# Supplementary material for: Circulating and Salivary NGF and BDNF Levels in SARS-CoV-2 Infection: Potential Predictor Biomarkers of COVID-19 Disease—Preliminary Data
Source: MDPI journal article supplement (doi:10.3390/jpm12111877), 2022-11-09
Supplement: s1 [file s1]

# Supplementary Materials

**Table S1.** Salivary and serum NGF and BDNF levels.

| VariableS     | N  | ACUTE PHASE |        |        |        |        | 6-MONTHS FOLLOWUP |        |        |        |        |     |                       |
|---------------|----|-------------|--------|--------|--------|--------|-------------------|--------|--------|--------|--------|-----|-----------------------|
|               |    | Min         | Q1     | Median | Q3     | Max    | Min               | Q1     | Median | Q3     | Max    | W   | P                     |
| Salivary NGF  | 15 | 154.8       | 411.7  | 797.8  | 1137.5 | 3000.6 | 21.4              | 70.9   | 120.0  | 509.5  | 1587.6 | 113 | 0.00116               |
| Sera NGF      | 9  | 4123.4      | 4341.7 | 4509.3 | 4948.1 | 5358.6 | 4335.8            | 4457.9 | 4640.2 | 5029.0 | 7256.0 | 15  | 0.42578               |
| Salivary BDNF | 15 | 27.2        | 77.8   | 177.0  | 248.0  | 580.8  | 21.7              | 37.3   | 44.1   | 64.9   | 182.2  | 114 | $8.54 \times 10^{-4}$ |
| Sera BDNF     | 9  | 1791.6      | 2043.0 | 2376.6 | 2757.1 | 3007.0 | 1721.8            | 1808.1 | 1989.1 | 2288.0 | 3637.7 | 33  | 0.25                  |

Acute phase: hospitalized patients; Remission phase: 6 months later; Data are expressed as pg/mL; W/P values, non-parametric two-paired Wilcoxon Signed Rank Test; LabTest: duo-set ELISA assay.
